# Supplementary material for: Influence of hypoxic stimulation on angiogenesis and satellite cells in mouse skeletal muscle
Source: PubMed Central journal article supplement (PMC6224099; doi:10.1371/journal.pone.0207040), 2018-11-08
Supplement: pone.0207040.s001.pdf [file pone.0207040.s001.pdf]

S1 Table. Results of ANOVA in data of Table 2 and Figure 3

| <b>SOL</b>                                 | Fiber type | Hypoxia effect | Aging effect | Interaction | <b>GA-S</b>                                | Fiber type | Hypoxia effect | Aging effect | Interaction |
|--------------------------------------------|------------|----------------|--------------|-------------|--------------------------------------------|------------|----------------|--------------|-------------|
| Population of muscle fiber type (%)        | I          | N.S.           | N.S.         | N.S.        | Population of muscle fiber type (%)        | IIx/b      | N.S.           | N.S.         | N.S.        |
|                                            | IIa        | N.S.           | N.S.         | N.S.        |                                            |            |                |              |             |
| Muscle fiber area ( $\mu\text{m}^2$ )      | I          | $P < 0.05$     | N.S.         | N.S.        | Muscle fiber area ( $\mu\text{m}^2$ )      | IIx/b      | N.S.           | N.S.         | N.S.        |
|                                            | IIa        | $P < 0.05$     | $P < 0.05$   | N.S.        |                                            |            |                |              |             |
| Myonuclear number/fiber                    | I          | N.S.           | N.S.         | N.S.        | Myonuclear number/fiber                    | IIx/b      | N.S.           | N.S.         | N.S.        |
|                                            | IIa        | N.S.           | N.S.         | N.S.        |                                            |            |                |              |             |
| Myonuclear domain size ( $\mu\text{m}^2$ ) | I          | $P < 0.05$     | $P < 0.05$   | N.S.        | Myonuclear domain size ( $\mu\text{m}^2$ ) | IIx/b      | N.S.           | N.S.         | N.S.        |
|                                            | IIa        | $P < 0.05$     | $P < 0.05$   | N.S.        |                                            |            |                |              |             |
| Satellite cell number/100 fiber            | I          | N.S.           | N.S.         | N.S.        | Satellite cell number/100 fiber            | IIx/b      | N.S.           | N.S.         | N.S.        |
|                                            | IIa        | N.S.           | N.S.         | N.S.        |                                            |            |                |              |             |
| Fiber-containing central nucleus (%)       | I          | N.S.           | N.S.         | N.S.        | Fiber-containing central nucleus (%)       | IIx/b      | N.S.           | $P < 0.05$   | N.S.        |
|                                            | IIa        | N.S.           | N.S.         | N.S.        |                                            |            |                |              |             |
| Capillary density                          | I+IIa      | $P < 0.05$     | N.S.         | N.S.        | Capillary density                          | IIx/b      | N.S.           | $P < 0.05$   | N.S.        |
| Capillary/fiber                            | I+IIa      | N.S.           | $P < 0.05$   | $P < 0.05$  | Capillary/Fiber                            | IIx/b      | N.S.           | $P < 0.05$   | N.S.        |
