# Supplementary material for: Influence of hypoxic stimulation on angiogenesis and satellite cells in mouse skeletal muscle
Source: PubMed Central journal article supplement (PMC6224099; doi:10.1371/journal.pone.0207040), 2018-11-08
Supplement: pone.0207040.s002.pdf [file pone.0207040.s002.pdf]

S2 Table. Results of ANOVA in data of Figure 4

| <b>SOL</b>    | Hypoxia effect | Aging effect | Interaction | <b>GA-S</b>   | Hypoxia effect | Aging effect | Interaction |
|---------------|----------------|--------------|-------------|---------------|----------------|--------------|-------------|
| Pax7          | N.S.           | N.S.         | N.S.        | Pax7          | N.S.           | $P < 0.05$   | N.S.        |
| MyoD          | $P < 0.05$     | N.S.         | N.S.        | MyoD          | $P < 0.05$     | N.S.         | N.S.        |
| myogenin      | N.S.           | N.S.         | N.S.        | myogenin      | $P < 0.05$     | $P < 0.05$   | N.S.        |
| VEGF-A        | $P < 0.05$     | $P < 0.05$   | N.S.        | VEGF-A        | $P < 0.05$     | N.S.         | N.S.        |
| FGF2          | N.S.           | $P < 0.05$   | N.S.        | FGF2          | $P < 0.05$     | N.S.         | $P < 0.05$  |
| BDNF          | $P < 0.05$     | $P < 0.05$   | N.S.        | BDNF          | $P < 0.05$     | $P < 0.05$   | N.S.        |
| PGC1 $\alpha$ | $P < 0.05$     | $P < 0.05$   | N.S.        | PGC1 $\alpha$ | $P < 0.05$     | N.S.         | N.S.        |
| nNOS          | $P < 0.05$     | $P < 0.05$   | N.S.        | nNOS          | N.S.           | N.S.         | N.S.        |
| iNOS          | N.S.           | N.S.         | N.S.        | iNOS          | N.S.           | N.S.         | N.S.        |
| eNOS          | N.S.           | $P < 0.05$   | $P < 0.05$  | eNOS          | N.S.           | N.S.         | N.S.        |
| MHCe          | $P < 0.05$     | N.S.         | $P < 0.05$  | MHCe          | N.S.           | N.S.         | N.S.        |
| Myostatin     | $P < 0.05$     | N.S.         | N.S.        | Myostatin     | N.S.           | N.S.         | N.S.        |
| TNF $\alpha$  | N.S.           | N.S.         | N.S.        | TNF $\alpha$  | N.S.           | N.S.         | N.S.        |
| Atrogin1      | $P < 0.05$     | N.S.         | N.S.        | Atrogin1      | N.S.           | N.S.         | N.S.        |
| ATG5          | N.S.           | N.S.         | N.S.        | ATG5          | $P < 0.05$     | N.S.         | N.S.        |
